# Supplementary material
Source: MDPI journal article supplement (https://www.mdpi.com/1996-1073/12/13/2484)
Supplement: s1 [file s1]

# Combined Environmental and Economic Assessment of Energy Efficiency Measures in a Multi-Dwelling Building

Ricardo Ramírez-Villegas <sup>1,2,\*</sup>, Ola Eriksson <sup>2</sup> and Thomas Olofsson <sup>3</sup>

<sup>1</sup> Dalarna University, School of Technology and Business Studies, 791 88 Falun, Sweden

<sup>2</sup> University of Gävle, Faculty of Engineering and Sustainable Development, 801 76 Gävle, Sweden; ola.eriksson@hig.se

<sup>3</sup> Umeå University, Department of Applied Physics and Electronics, 901 87 Umeå, Sweden; Thomas.olofsson@umu.se

\* Correspondence: rrv@du.se; Tel.: +46-76-100-1745

Received: 9 May 2019; Accepted: 25 June 2019; Published: 27 June 2019

**Table S1.** Case Study Building Information.

| Basic Information                       |                                          |
|-----------------------------------------|------------------------------------------|
| Latitude                                | 60.49 N                                  |
| Longitude                               | 16.4 E                                   |
| Elevation (m)                           | 153                                      |
| Number of storeys                       | 3                                        |
| Total heated are (m <sup>2</sup> )      | 2822                                     |
| Building gross volume (m <sup>3</sup> ) | 8387                                     |
| Number of apartments                    | 36                                       |
| Type of heating system                  | Hydronic heating system. District System |
| Type of ventilation                     | Mechanical exhaust ventilation           |
| Total U-*Value (W/K m <sup>2</sup> )    | 1.47                                     |
| Heat demand (KWh/m <sup>2</sup> year)   | 152                                      |

**Table S2.** Renovations Scenarios.

| Renovation Scenario | Outer Walls                    | Unheated Attic                 | Windows                                  | Ventilation               | Heating Source       | Others                    |
|---------------------|--------------------------------|--------------------------------|------------------------------------------|---------------------------|----------------------|---------------------------|
| 0                   | 120 mm mineral wool insulation | 150 mm mineral wool insulation | Double casement                          | Mechanical                | District Heating     |                           |
| 1                   | 120 mm mineral wool insulation | 150 mm mineral wool insulation | Double casement                          | Mechanical                | District Heating     | Photovoltaic panel system |
| 2                   | 120 mm mineral wool insulation | 150 mm mineral wool insulation | Double casement                          | Mechanical                | Geothermal Heat Pump |                           |
| 3                   | 120 mm mineral wool insulation | 150 mm mineral wool insulation | Double casement                          | Heat Recovery Ventilation | District Heating     |                           |
| 4                   | 120 mm mineral wool insulation | 150 mm mineral wool insulation | Double casement                          | Heat Recovery Ventilation | Geothermal Heat pump | Photovoltaic Panels       |
| 5                   | 480 mm mineral wool insulation | 300 mm mineral wool insulation | 3-glass argon filled low emissivity pane | Mechanical                | District Heating     | Photovoltaic panes        |
| 6                   | 480 mm mineral wool insulation | 300 mm mineral wool insulation | 3-glass argon filled low emissivity pane | Mechanical                | Geothermal Heat pump |                           |
| 7                   | 480 mm mineral wool insulation | 300 mm mineral wool insulation | 3-glass argon filled low emissivity pane | Heat recovery ventilation | District Heating     |                           |
| 8                   | 480 mm mineral wool insulation | 300 mm mineral wool insulation | 3-glass argon filled low emissivity pane | Heat recovery ventilation | Geothermal Heat pump | Photovoltaic panes        |

**Table S3.** Materials datasets not listed in the article.

| Resource                                 | Quantity | Unit           | Service Life | Country |
|------------------------------------------|----------|----------------|--------------|---------|
| Ventilation exhaust unit                 | 3        | pcs            | 25 years     | France  |
| Dry mortar                               | 71,800   | kg             | As building  | Norway  |
| Gypsum plasterboard                      | 1198     | m <sup>2</sup> | As building  | Norway  |
| Mineral wool. Insulation                 | 1198     | m <sup>2</sup> | As building  | Denmark |
| Radon and moisture membrane 1.2 mm       | 1198     | m <sup>2</sup> | 30 years     | Norway  |
| Calcium silicate block 115 mm            | 1198     | m <sup>2</sup> | As building  | Germany |
| Min. wool insul. for pitched roof 300 mm | 971      | m <sup>2</sup> | As building  | Denmark |
| Triple glazed windows, wood-alum. frame  | 298      | m <sup>2</sup> | 40 years     | Norway  |
| Heating system                           | 2822     | m <sup>2</sup> | As building  | Finland |
| Ventilation system                       | 2822     | m <sup>2</sup> | 30 years     | Finland |
| Heat Recovery Ventilation unit           | 1        | pcs            | 25 years     | Germany |

**Table S4.** Fuel use (%) for district heating 2016.

| Fuel Use (%)                                                   | Borlänge Energi | Göteborg Energi |
|----------------------------------------------------------------|-----------------|-----------------|
| Recycled energy                                                | 67              | 70.4            |
| Industrial Excess Heat                                         | 20              | 29.7            |
| Flue Gas Condensing                                            | 1.6             | 11.1            |
| Heat from Heat Pumps (Netto)                                   | 0.5             | 5.7             |
| Municipal Solid Waste (MSW) Incineration                       | 44.3            | 23.9            |
| Blast Furnace Gas                                              | 0.6             | 0               |
| Renewable energy                                               | 30.7            | 9.9             |
| Pellets, Bricks and powder                                     | 0               | 1.3             |
| Secondary biofuels                                             | 28.6            | 4.3             |
| Bio oil and tall oil pitch                                     | 0               | 0.2             |
| Renewable electricity                                          | 2.1             | 4.2             |
| Others                                                         | 1.2             | 2               |
| Hot water from other companies, renewables and recycled energy | 1.2             | 2               |
| Fossil energy                                                  | 1.1             | 17.7            |
| Oil                                                            | 1.1             | 0.2             |
| Natural Gas                                                    | 0               | 17.5            |

**Table S5.** Greenhouse gas emissions (GHG) emission factors for DH 2016.

| GHG Emissions (g CO <sub>2</sub> eq/kWh) | Borlänge Energi | Göteborg Energi |
|------------------------------------------|-----------------|-----------------|
| Total Emissions                          | 66              | 79              |
| Combustion                               | 62              | 69              |
| Fuel transport and production            | 4               | 10              |

**Table S6.** LCC parameters.

| Resource                                                                            | Quantity | Unit           | Unit Cost (SEK) |
|-------------------------------------------------------------------------------------|----------|----------------|-----------------|
| Ventilator, central, 5,000 m <sup>3</sup> /h with heat recovery                     | 1        | unit           | 200,000         |
| Electric heat pump (brine-water, geothermal probe), 70 kW                           | 1        | unit           | 100,000         |
| Pipework for electric heat pump (brine-water, geothermal probe), 70 kW              | 1        | unit           | 1,500,000       |
| Photovoltaic panel system for roofs, 300 Wc capacity,                               | 67       | unit           | 8611            |
| Heating system (steel pipes and heat distribution center), room area m <sup>2</sup> | 2822     | m <sup>2</sup> | 350             |
| Ventilation system with plastic pipes, room area m <sup>2</sup>                     | 2822     | m <sup>2</sup> | 350             |
| Ventilator, central, 5,000 m <sup>3</sup> /h with heat recovery                     | 1        | unit           | 200,000         |
| Electricity, Sweden                                                                 | 154      | kWh            | 2.05            |
| Gypsum plasterboard, 12.5 mm, 9 kg/m <sup>2</sup> ,                                 | 1198     | m <sup>2</sup> | 139.81          |
| Thermal insulation for external wall, average product)                              | 1198     | m <sup>2</sup> | 3683.79         |
| Radon and moisture membrane for site construction                                   | 1198     | m <sup>2</sup> | 66.76           |
| Calcium silicate block                                                              | 1198     | m <sup>2</sup> | 6557.6          |
| Dry mortar                                                                          | 71,880   | kg             | 26.26           |
| Window, triple glazed, wood-alu frame                                               | 298      | m <sup>2</sup> | 3937            |

**Table S7.** End of life scenarios.

| Material Group                                                    | Material Group                         | Materials Included                                                                                          | C3–C4, Waste Processing and Landfilling                 | D, Recycling Benefits                                  |
|-------------------------------------------------------------------|----------------------------------------|-------------------------------------------------------------------------------------------------------------|---------------------------------------------------------|--------------------------------------------------------|
| Mineral building materials                                        | Recycling for ground works             | Concrete, Cement, Bricks, Porcelain, Plaster, Clay products, Stone, Ceramics, Asphalt                       | C3: Construction waste preparation for recycling        | Recycling benefit from replacing the primary gravel    |
| Metals                                                            | Metal preparation and recycling        | Aluminum, Steel, Stainless steel, Galvanized steel, Copper coated, Copper uncoated, Brass, Zinc, Lead       | C3: Metal waste preparation                             | Recycling benefits for replacing virgin metal          |
| Bio based materials with heating value                            | Incineration and energy recovery       | Wood, Wood products                                                                                         | C3: Construction waste incineration for energy recovery | Recovered energy (replacing average energy production) |
| Other materials with heating value                                | Incineration and energy recovery       | Plastics                                                                                                    | C3: Construction waste incineration for energy recovery | Recovered energy (replacing average energy production) |
| Other materials that can be landfilled in construction waste site | Disposal/landfilling of inert material | Coatings, Synthetic materials, Panels and boards, Insulating materials, Glass, Window and façade components | Disposal of inert construction waste                    | -                                                      |
